# Supplementary material
Source: PubMed Central journal article supplement (PMC3575679)
Supplement: NIHMS438296-supplement-Supplemental_Figures.pdf [file NIHMS438296-supplement-Supplemental_Figures.pdf]

Supplemental data:

**Alveolar macrophage activation and an emphysema-like phenotype in adiponectin deficient mice**

Summer, R<sup>1\*</sup>, Little, F<sup>1</sup>, Ouchi, N<sup>2</sup>, Takemura, Y<sup>2</sup>, Aprahamian, T.<sup>2</sup>, Dwyer, D<sup>1</sup>,  
Fitzsimmons, K.<sup>1</sup>, Suki, B.<sup>3</sup>, Parameswaran, H.<sup>3</sup>, Fine, A.<sup>1</sup>, Walsh, K.<sup>2</sup>

<sup>1</sup> The Pulmonary Center, R-304  
Boston University School of Medicine  
80 East Concord St.  
Boston, MA 02118

<sup>2</sup> Whitaker Cardiovascular Institute  
Molecular Cardiology/Whitaker Cardiovascular Institute  
Boston University School of Medicine  
715 Albany Street W611  
Boston, MA 02118

<sup>3</sup> Department of Biomedical Engineering  
Boston University  
44 Cummington Street  
Boston, MA 02215

\*Correspondence  
Ross Summer  
Tel. 1-617-638-4860  
Fax. 1-617-536-8093  
Email: rsummer@bu.edu

This work was supported by National Institute of Health Grants K08 HL077138, K08 HL071607, AG15052, and HL-59215.

## Body Mass (grams)

|         | Day 6         | Day 18        | 3 Month         |
|---------|---------------|---------------|-----------------|
| WT      | 3.42 +/- 0.21 | 8.34 +/- 0.22 | 24.66 +/- 0.31  |
| APN -/- | 3.92 +/- 0.25 | 7.94 +/- 0.26 | 26.675 +/- 0.60 |

Supplemental Figure 1: Body mass of age matched wild-type and adiponectin -/- mice (n = 5, each time point).

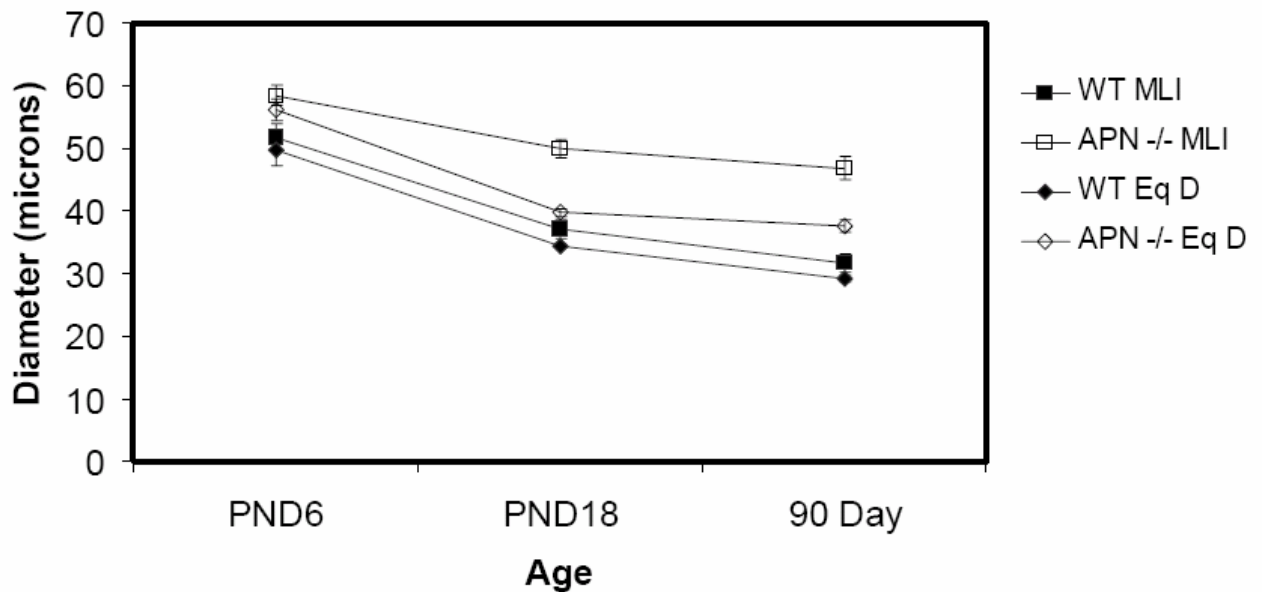

Supplemental figure 2: Alveolar size estimated by an automated computer assisted method (equivalent diameter, Eq D) and by mean linear intercept (MLI) was increased in adiponectin -/- mice. MLI and equivalent diameter measurements were compared in wild-type and adiponectin -/- mice at 6 days, 18 days and 3 months of age. Alveolar diameter by both methods was found to be significantly increased in adiponectin -/- mice at 18 days and 3 months of age ( $p < 0.0001$ ). In wild-type mice, alveolar diameter decreased with age as a result of post-natal alveolarization. In contrast, alveolar diameter was not significantly different at 18 days and 3 months in adiponectin -/- mice.

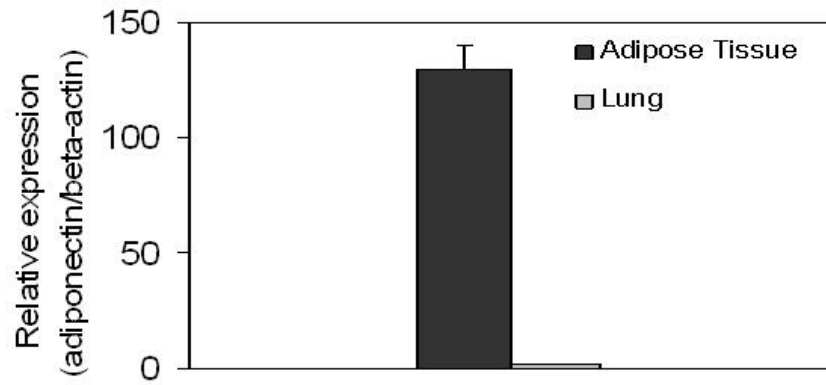

Supplemental figure 3: Negligible quantities of adiponectin transcript are expressed in lung. Real-time PCR in wild-type lung demonstrates that the relative quantity of adiponectin transcript in lung is negligible, whereas the message is abundantly expressed in adipose tissue (n =3, each group). The numbers reported represent the mean and the standard error (S.E.).

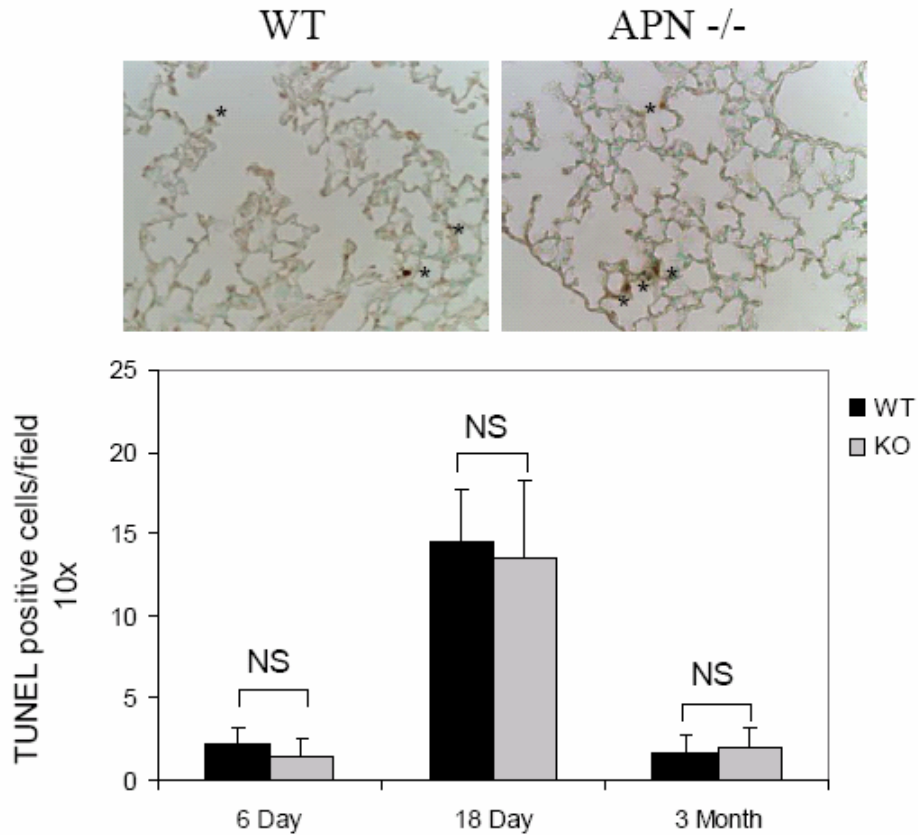

Supplemental figure 4: The number of TUNEL+ cells (Chemicon, Billerica, MA) was similar in wild-type and adiponectin  $-/-$  mice. Staining was performed on paraffin-embedded lung sections at 6 days, 18 days and 3 months of age ( $n = 3$  at all time points).

A) Representative image at 3 months shows similar number of TUNEL+ (brown) cells.

B) The number of TUNEL+ cells in lungs of wild-type and adiponectin  $-/-$  mice was similar at all time points (N.S, non-significant). Values are representative of the mean and S.E. from counting the number of positive cells per 10x field in three random sections in each mouse.

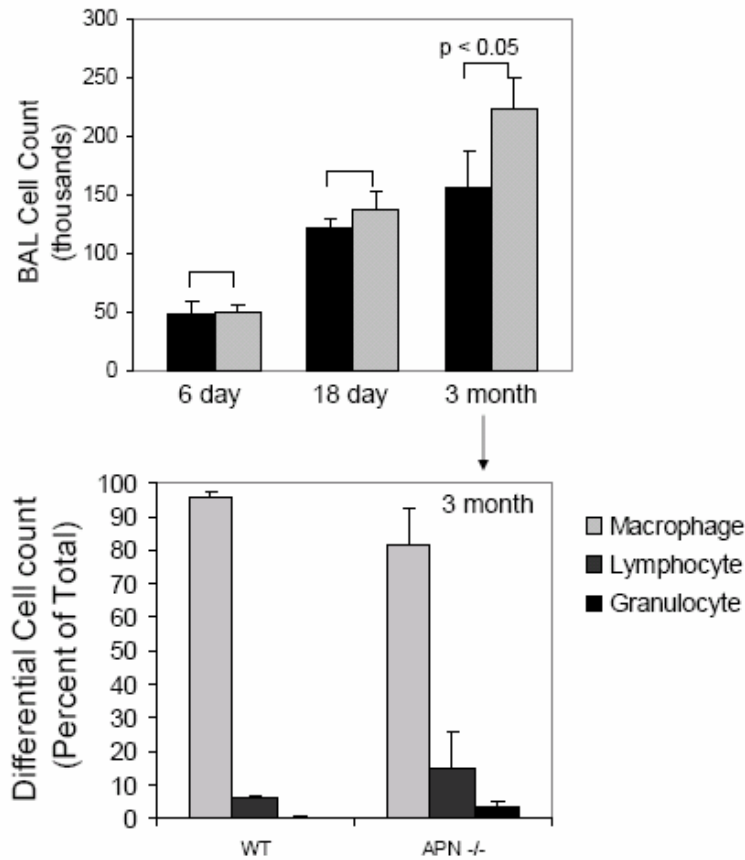

Supplemental figure 5: Profile of cells in broncho-alveolar lavage fluid (BALF) of 6 day, 18 day, and 3 month-old wild-type and adiponectin <sup>-/-</sup> mice (n =5). *A*: Total cell counts were significantly increased in BALF of 3-month old adiponectin <sup>-/-</sup> mice. Total cell counts in wild-type and adiponectin <sup>-/-</sup> BALF were similar at 6 days and 18 days. *B*: Differential cell counts showed that the relative percent of macrophages, lymphocytes and granulocytes were similar in wild-type and adiponectin <sup>-/-</sup> mice at 3 months. Neutrophils were the predominant granulocyte population in BALF of adiponectin <sup>-/-</sup> mice (95%). Differential cell counts in wild-type and adiponectin <sup>-/-</sup> mice were similar in post-natal day 6 and 18 BALF (data not shown). Numbers reported represent the mean and the standard error (S.E.).
